# Supplementary material for: A far-red-emissive AIE active fluorescent probe with large stokes shift for detection of inflammatory bowel disease in vivo
Source: Royal Society of Chemistry journal article supplement (doi:10.1039/c7tb03168h), 2018-01-01
Supplement: c7tb03168h1.pdf [file c7tb03168h1.pdf]

## Far-red-emissive AIE Active Fluorescent Probe with Large Stokes Shift for Detection of Inflammatory Bowel Disease *In Vivo*

Wanfu Xu<sup>a,b,\*</sup>, Liying He<sup>a,\*</sup>, Qi Xia<sup>c</sup>, Chunhong Jia<sup>d</sup>, Lanlan Geng<sup>a</sup>, Min Yang<sup>a</sup>, Zhaohui Xu<sup>a</sup>, Peiyu Chen<sup>a</sup>, Yang Cheng<sup>a,b</sup>, Junhong Zhao<sup>a</sup>, Hongli Wang<sup>a</sup>, Huan Chen<sup>a</sup>, Yuhua Zhang<sup>e</sup>, Sitang Gong<sup>a,b,†</sup>, Ruiyuan Liu<sup>c,†</sup>

a. Department of Gastroenterology, Guangzhou Women and Children's Medical Center, Guangzhou Medical University, Guangzhou, 510623, China;

b. Guangzhou Institute of Paediatrics, Guangzhou Women and Children's Medical Center, Guangzhou Medical University, Guangzhou, 510623, China;

c. School of Biomedical Engineering, Southern Medical University, Guangzhou 510515. China;

d. Department of Paediatrics, The Third Affiliated Hospital of Guangzhou medical University, Guangzhou 510150, China.;

e. Department of Paediatrics, The Ninety-Five Hospital of Chinese PLA, Putian, 351100, China.;

\* these authors contributed equally to this work;

† these authors are co-responding authors;

E-mail: ruiyliu@smu.edu.cn (Ruiyuan Liu); gongsitang@hotmail.com (Sitang Gong)

## Supplementary Results

Fig. S1. <sup>1</sup>H NMR spectrum of PTZB-FR in DMSO-d<sub>6</sub>

Fig. S2. <sup>13</sup>C NMR spectrum of PTZB-FR in DMSO-d<sub>6</sub>

Fig. S3. IR spectrum of PTZB-FR

Fig. S4. ESI-MS spectrum of PTZB-FR

Fig. S5 Particle-size distribution of PTZB-FR in water studied via DLS experiment

Fig. S6 UV-spectra of PTZB-FR in different solvent

Fig.S7 Molecular orbital amplitude plot of HOMO and LUMO energy level of PTZB-FR calculated by B3LYP/6-31G (d) basis set

Fig.S8. (A)Fluorescent images HT-29 cells stained with PTZB-FR. (B)Flow cytometry histograms of HT-29 cells after incubation with 5 $\mu$ M PTZB-FR (left panel), unpaired t-test was performed to analyzed the fluorescence intensity as indicated

Fig. S9 Time course of PL intensity change of 5 $\mu$ M PTZB-FR in DMEM with 10% FBS at 37 °C.

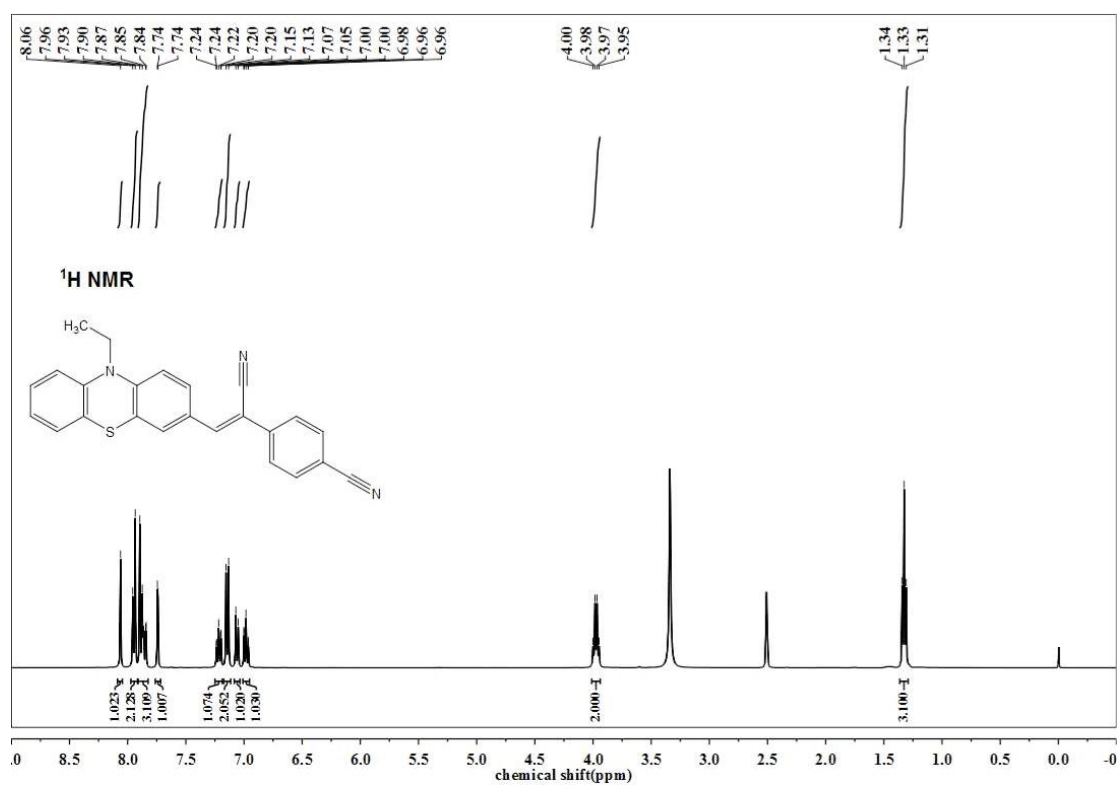

Fig. S1. <sup>1</sup>H NMR spectrum of PTZB-FR in DMSO-d<sub>6</sub>

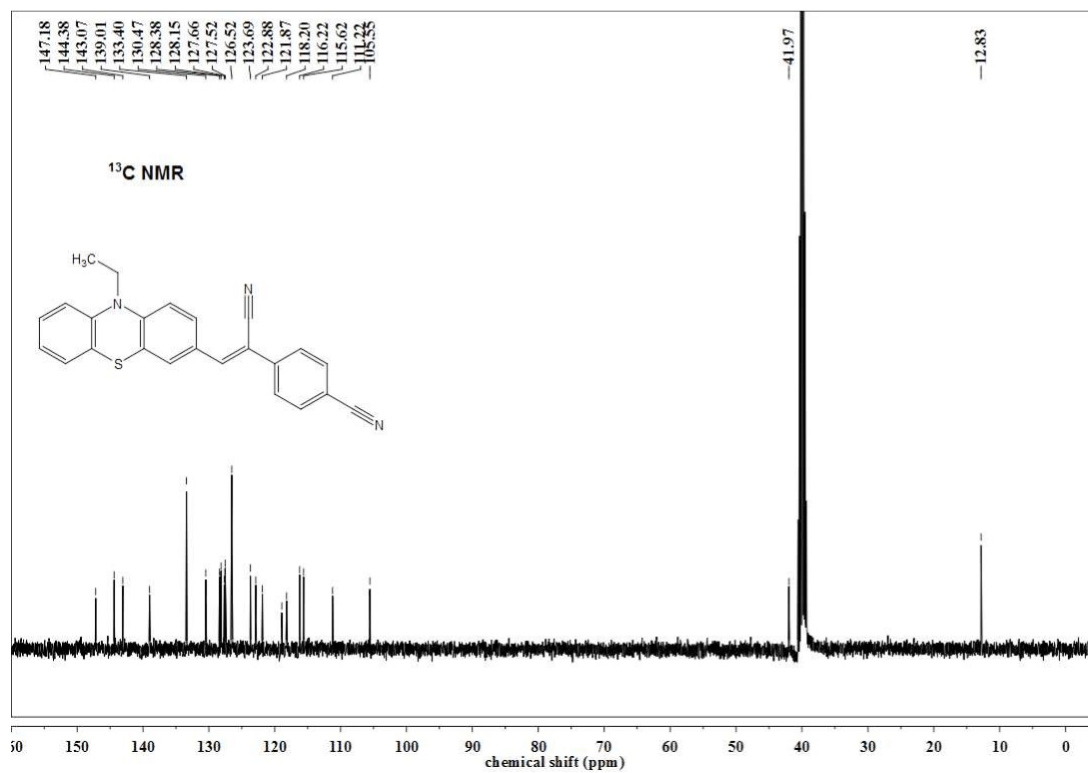

Fig. S2. <sup>13</sup>C NMR spectrum of PTZB-FR in DMSO-d6

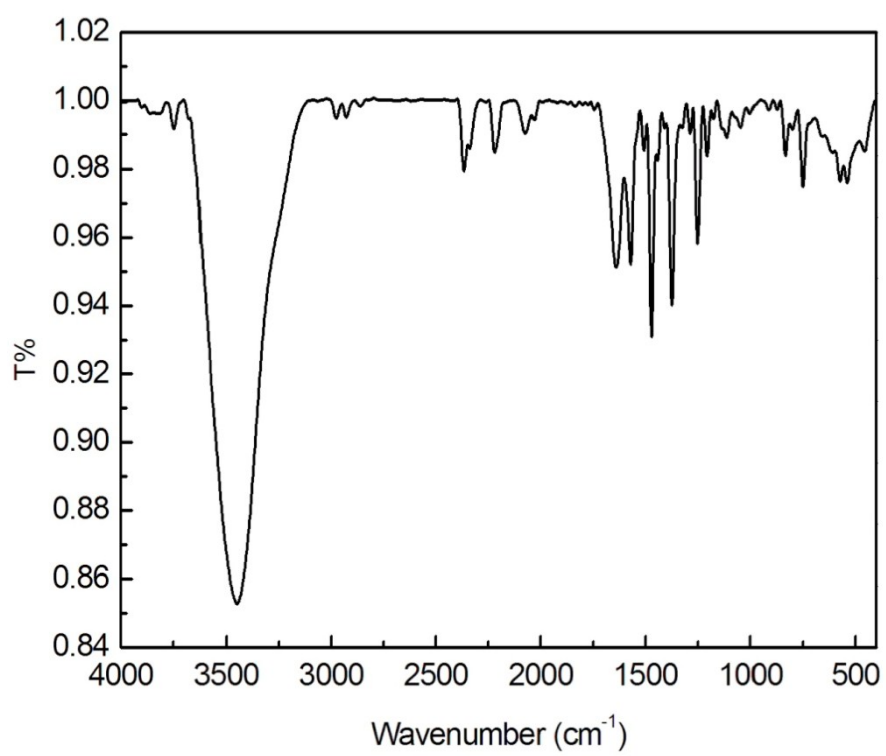

Fig. S3. IR spectrum of PTZB-FR

## Generic Display Report

### Analysis Info

Analysis Name D:\Data\201707\17072001\17072001\_P1-A-6\_01\_21248.d  
Method esi\_pos\_50-1000\_with calibration\_for 1min.m  
Sample Name 17072001  
Comment

Acquisition Date 7/25/2017 9:31:35 AM

Operator HSJ

Instrument maXis impact

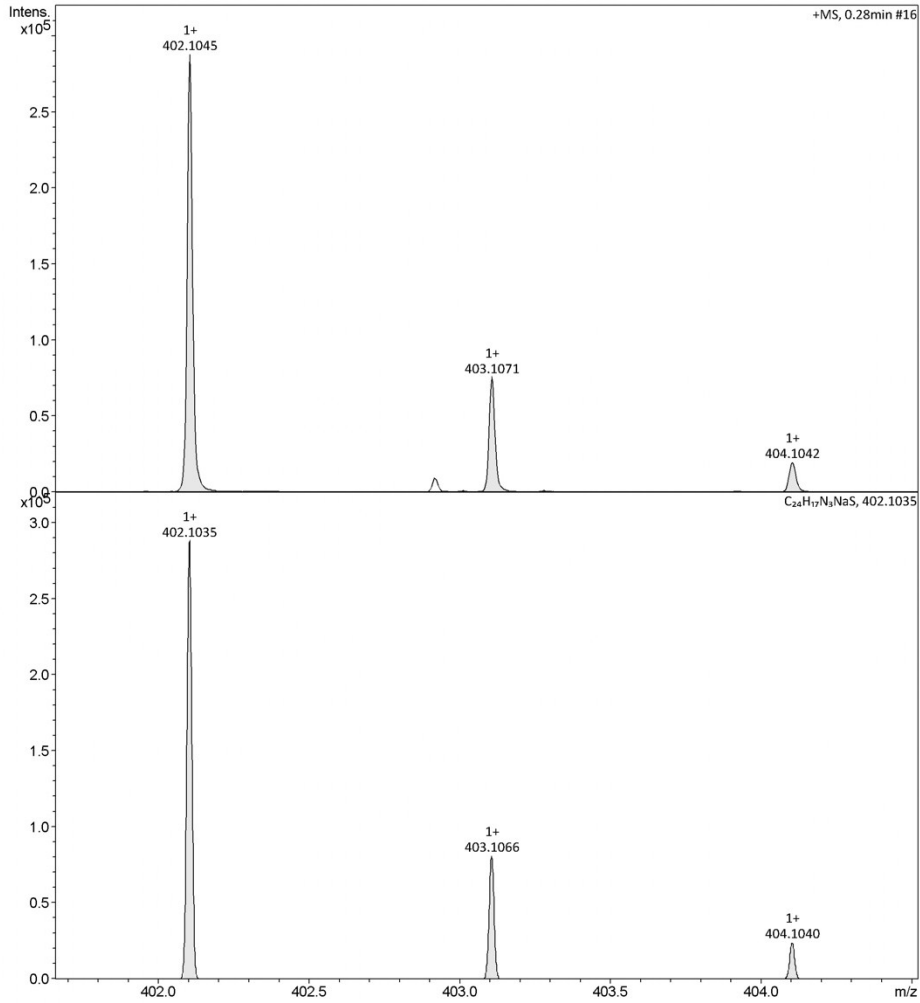

Fig. S4. ESI-MS spectrum of PTZB-FR

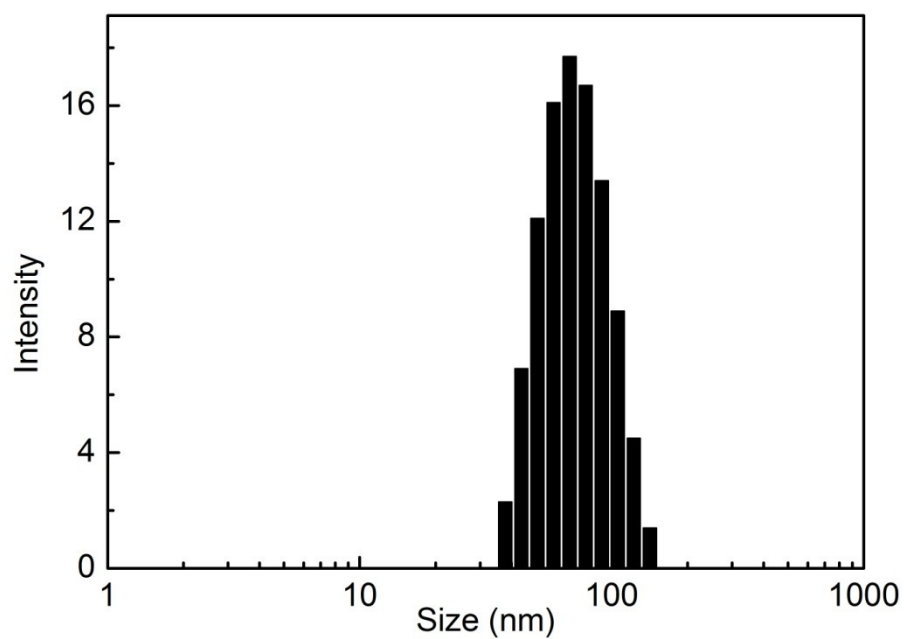

Fig. S5 Particle-size distribution of PTZB-FR in water studied via DLS experiment

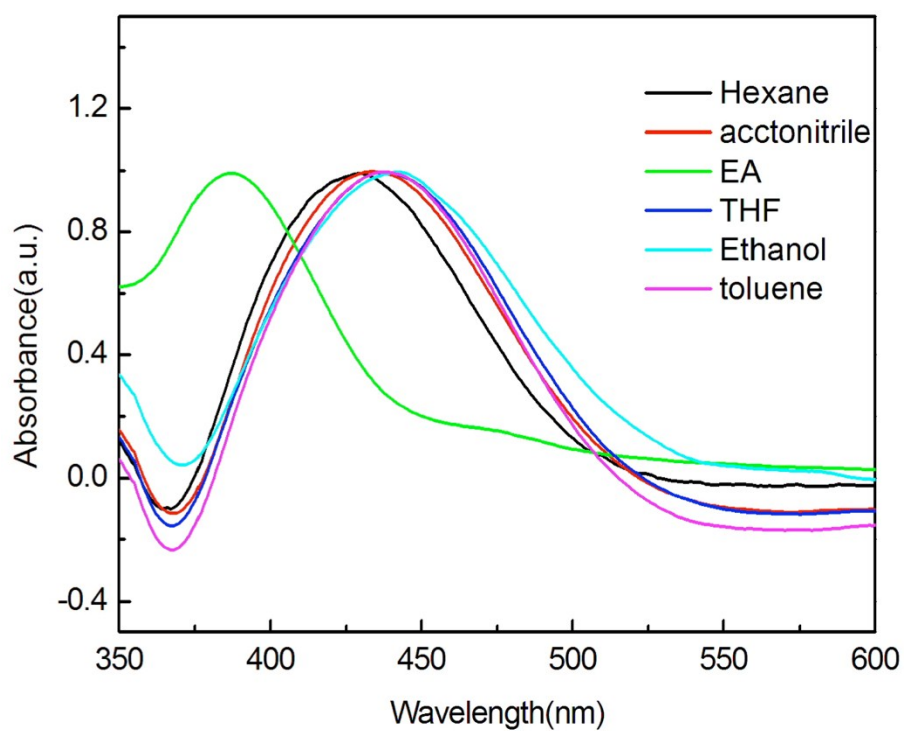

Fig. S6 UV-spectra of **PTZB-FR** in different solvent



**LUMO:-2.378eV**

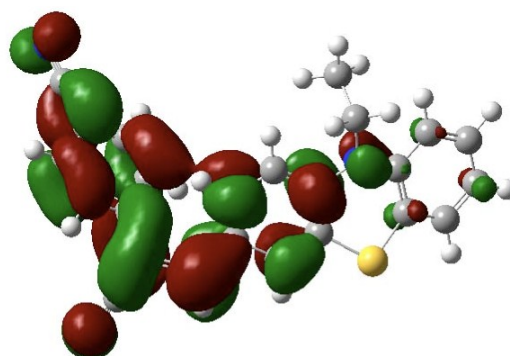

**HOMO:-5.342eV**

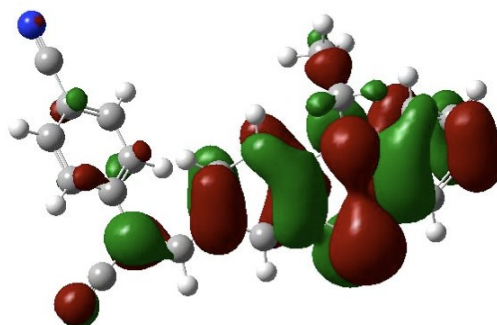

Fig. S7 Molecular orbital amplitude plot of HOMO and LUMO energy level of **PTZB-FR** calculated by B3LYP/6-31G (d) basis set

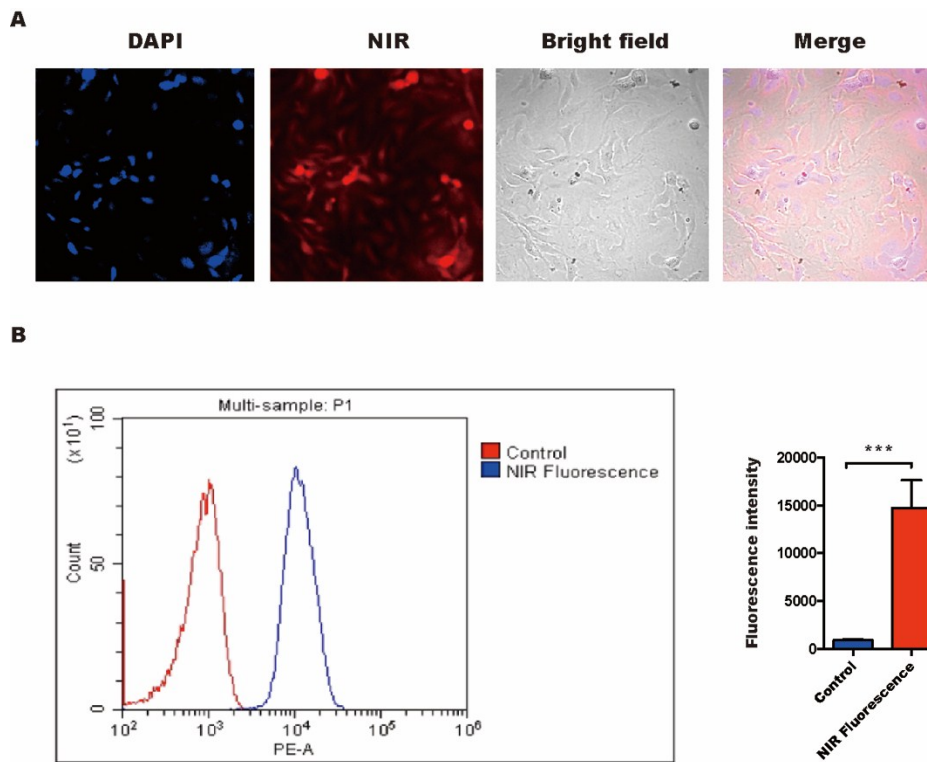

Fig. S8. (A) Fluorescent images HT-29 cells stained with **PTZB-FR**. (B) Flow cytometry histograms of HT-29 cells after incubation with  $5\mu\text{M}$  **PTZB-FR** (*left panel*), unpaired t-test was performed to analyzed the fluorescence intensity as indicated

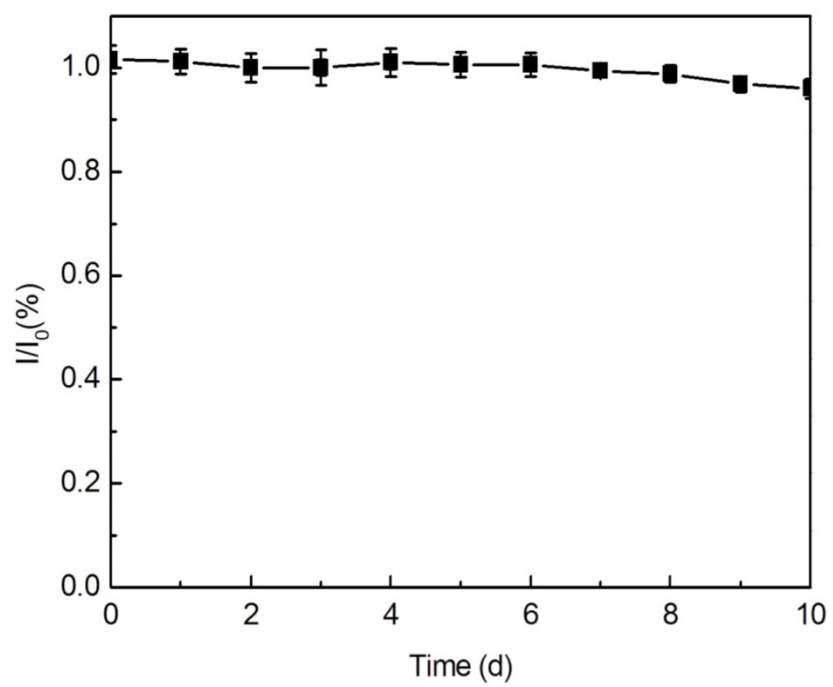

Fig. S9 Time course of PL intensity change of 5 $\mu$ M **PTZB-FR** in DMEM with 10% FBS at 37 °C.
